# Supplementary material for: Water-retaining, tough and self-healing hydrogels and their uses as fire-resistant materials
Source: Royal Society of Chemistry journal article supplement (doi:10.1039/c9py01015g), 2019-01-01
Supplement: c9py01015g1.pdf [file c9py01015g1.pdf]

## Supporting Information

**Title** Water-retaining, tough and self-healing hydrogels and their uses as fire-resistant materials

*Xiao Feng Cui, Wen Jiang Zheng, \* Wei Zou, Xing Yong Liu, Hu Yang, Jie*

*Yan, Yang Gao, \**

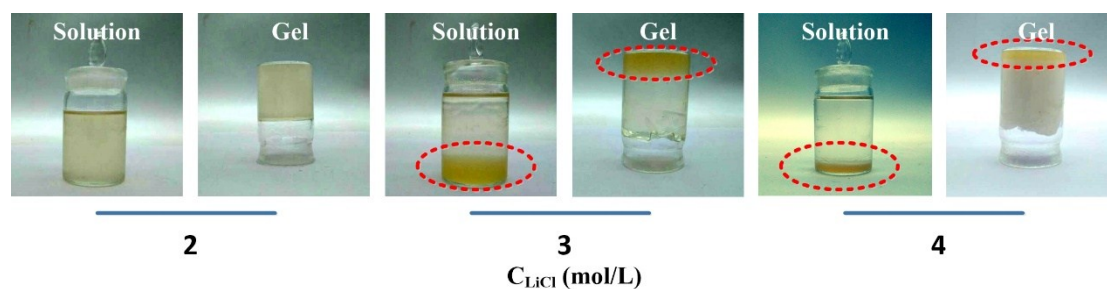

**Figure S1.** Hydrogels prepared by adding LiCl into the prepolymerization solution directly.

As **Figure S1** shows, solution stratification is obviously seen when  $C_{\text{LiCl}}$  is larger than 2 mol/L if adding LiCl into the prepolymerization solution directly. Without the constraints of the P(AAm-co-SMA) network, the Li-alginate chains will precipitate at the bottom owing to the reducing of hydrophilic in high  $C_{\text{LiCl}}$  solution. Thus, the Li-alginate/P(AAm-co-SMA) should be prepared by synthesis the P(AAm-co-SMA) network previously to obtain a homogeneous IPN gel network.

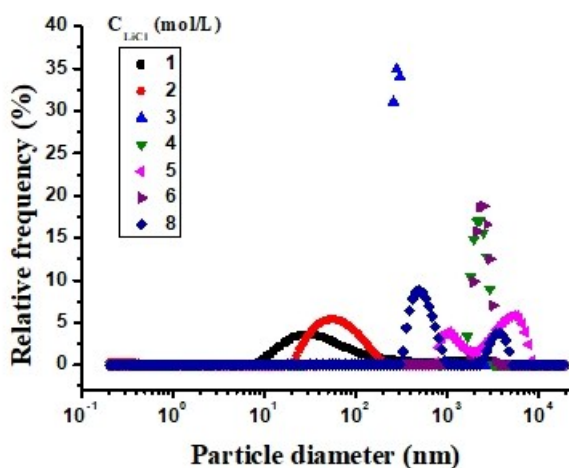

**Figure S2.** Micelle size in LiCl solution with different concentrations.

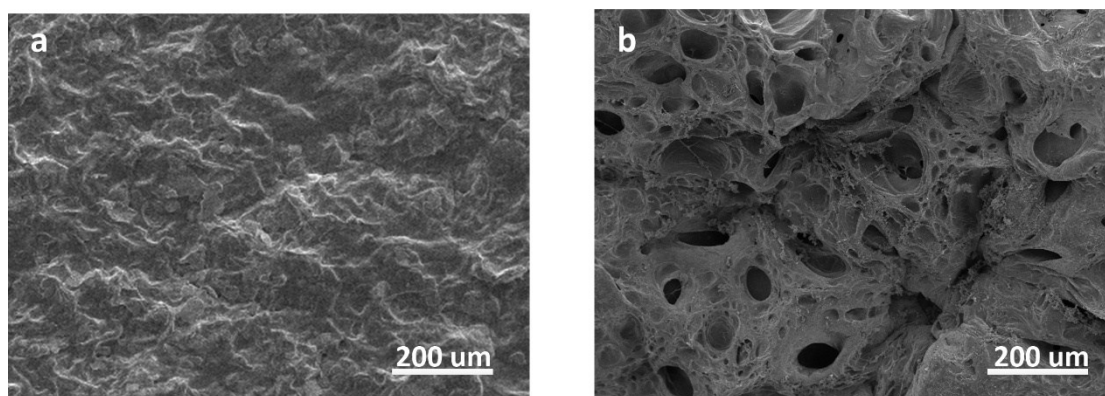

**Figure S3.** Scanning electron microscopy pictures of Li-alginate/P(AAm-co-SMA) hydrogels with  $C_{LiCl}$  of 2 mol/L (a) and 4 mol/L (b).

The scanning electron microscopy (SEM) was performed using Hitachi S3400N scanning electron microscopy. The gel specimens were prepared by freeze-drying and then cryogenically fractured in liquid nitrogen. The fractured surface was coated with a thin layer of nano-gold and then applied to SEM observation. Figure S3 shows the SEM pictures of Li-alginate/P(AAm-co-SMA) (2) (**Figure S3 a**) and Li-alginate/P(AAm-co-SMA) (4) (**Figure S3 b**) hydrogels. The gel network changes from homogeneous to porous structure with different pore size. This is probably due to the phase separation of Li-

alginate and P(AAm-**co**-SMA) networks. Because the LiCl has a significant effect on the hydrophilicity of alginate polyelectrolyte. So, the higher  $C_{LiCl}$  (4 mol/L) in hydrogels causes greater difference in hydrophilicity between Li-alginate and P(AAm-**co**-SMA) networks. As a result, the morphology of hydrogels networks changes along with phase separation.

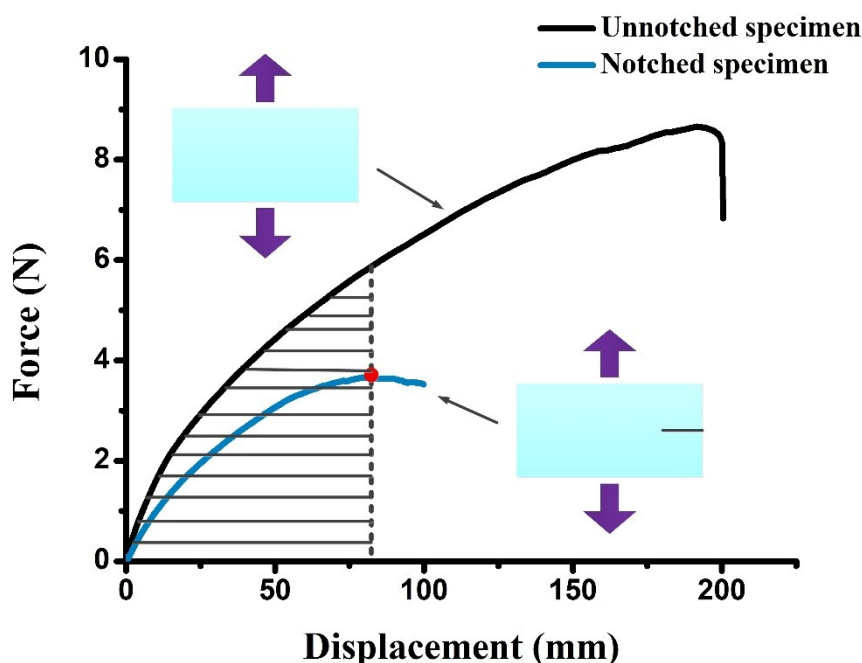

**Figure S4.** Force-displacement curves of hydrogel specimens. The unnotched and notched specimens as depicted are applied to stretch to obtain the critical distance when the notch begins to expand. Then fracture energy is obtained by the area with the horizontal lines divided by the cross-sectional area of gel specimens.

The fracture energy of hydrogels was tested and calculated as follows. In brief, two specimens (a notched and an unnotched) with the same width  $a_0$  and thickness  $b_0$  were prepared. Then the unnotched and notched specimens were stretched to obtain the force-displacement curves. Critical displacement

was also been recorded from the force-displacement of notched specimen before the notch began to expand (the red dot in **Figure 3S**). The area beneath the force-displacement of unnotched specimen gave the work ( $W_c$ ) done by force before the sample ruptured. Finally, to quantify the crack resistance property, the fracture energy was calculated according to **Equation S1** as below:

$$W_c/(a_0 \times b_0) \tag{S1}$$
